# Supplementary material
Source: PubMed Central journal article supplement (PMC3344954)
Supplement: 1114128109_pnas.201114128SI.pdf [file 1114128109_pnas.201114128SI.pdf]

# Supporting Information

Dvir et al. 10.1073/pnas.1114128109

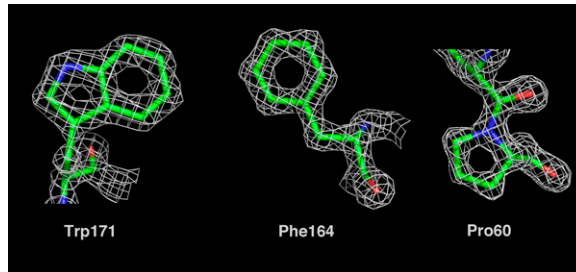

Fig. S1. Representative electron density of the refined structure of the autosomal recessive hypercholesterolemia (ARH)-LDL receptor (LDLR) tail complex. The 2Fo-Fc electron density map (gray mesh) contoured at 1.5  $\sigma$  around selected ARH residues (green sticks for carbons, red and blue for oxygens and nitrogens, respectively) reveals outstanding atomic resolution.

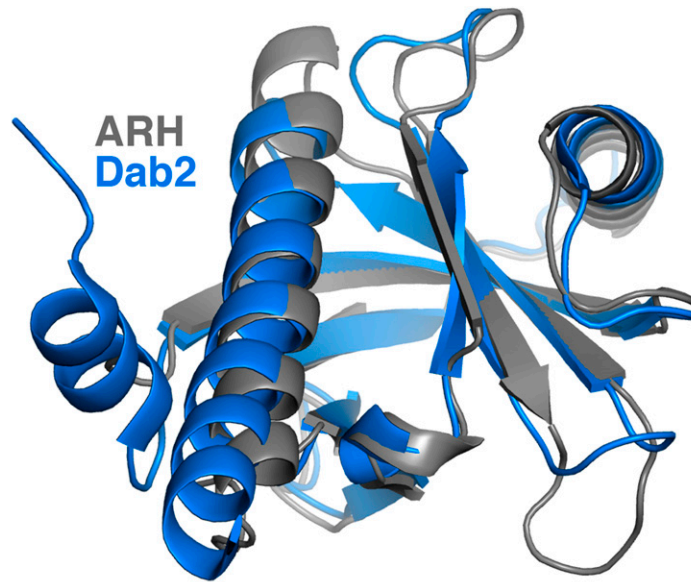

**% identity** **Structure-based sequence alignment**

|                                              |                                                                                                                                                                                                                                                                                                                                                                                                                                                                                                                                                                                                                          |
|----------------------------------------------|--------------------------------------------------------------------------------------------------------------------------------------------------------------------------------------------------------------------------------------------------------------------------------------------------------------------------------------------------------------------------------------------------------------------------------------------------------------------------------------------------------------------------------------------------------------------------------------------------------------------------|
| <p>Dab1 17.8(57.3)<br/>Dab2 17.0<br/>ARH</p> | <pre> EGVRYKAKLIGIDEVS AARGDKLCQDSMMKLGVVAGARSKGEHKQKIFLTIISFGGIKIFDEKTGALQ DGVKYYAKLIGIDVFDARGDKMSQDSMMKLGVAAGRSQGQHKQRIWVNIISLSGIKIIDERTGVIE EGMVVPSLKYLGMTLVERPKQEEELSAAAYKRIYATAKASG--KKLQKVTTEKVS PRGELITDSLTSQEI 43          50          60          70          80          90          100  1NU2-dab1  HHHAVHCTSYIAKDI TDHRAFGYVCG-REG-NHREVAIKT-AQ--AAEPVILLDLRDLFOLLYELKORR HEHPYNKISFLARDVTDNRAFGYVCG-REG-QHQFFAIKT-GQ-QAFLVVDLKDLEQVYINVKKKEE ARH        ENYSIYRISYCTADKMHDKVEAYIAQSQQNESLECHAF LCTKRKVAQAVTLTYVAQAERKVAFFWQVSS 110        120        130        140        150        160        170 </pre> |
|----------------------------------------------|--------------------------------------------------------------------------------------------------------------------------------------------------------------------------------------------------------------------------------------------------------------------------------------------------------------------------------------------------------------------------------------------------------------------------------------------------------------------------------------------------------------------------------------------------------------------------------------------------------------------------|

Fig. S2. Superposition of the structure of ARH (gray) and Dab2 (blue) phosphotyrosine-binding (PTB) structures. The overall fold (*Upper*, ribbon representation) is quite similar despite the low sequence identity (shown in the structure-based alignment, *Lower*). The PTB domains of Dab1 and Dab2 are 57.3% identical, but both are less than 18% identical with ARH. Identical residues are shaded.

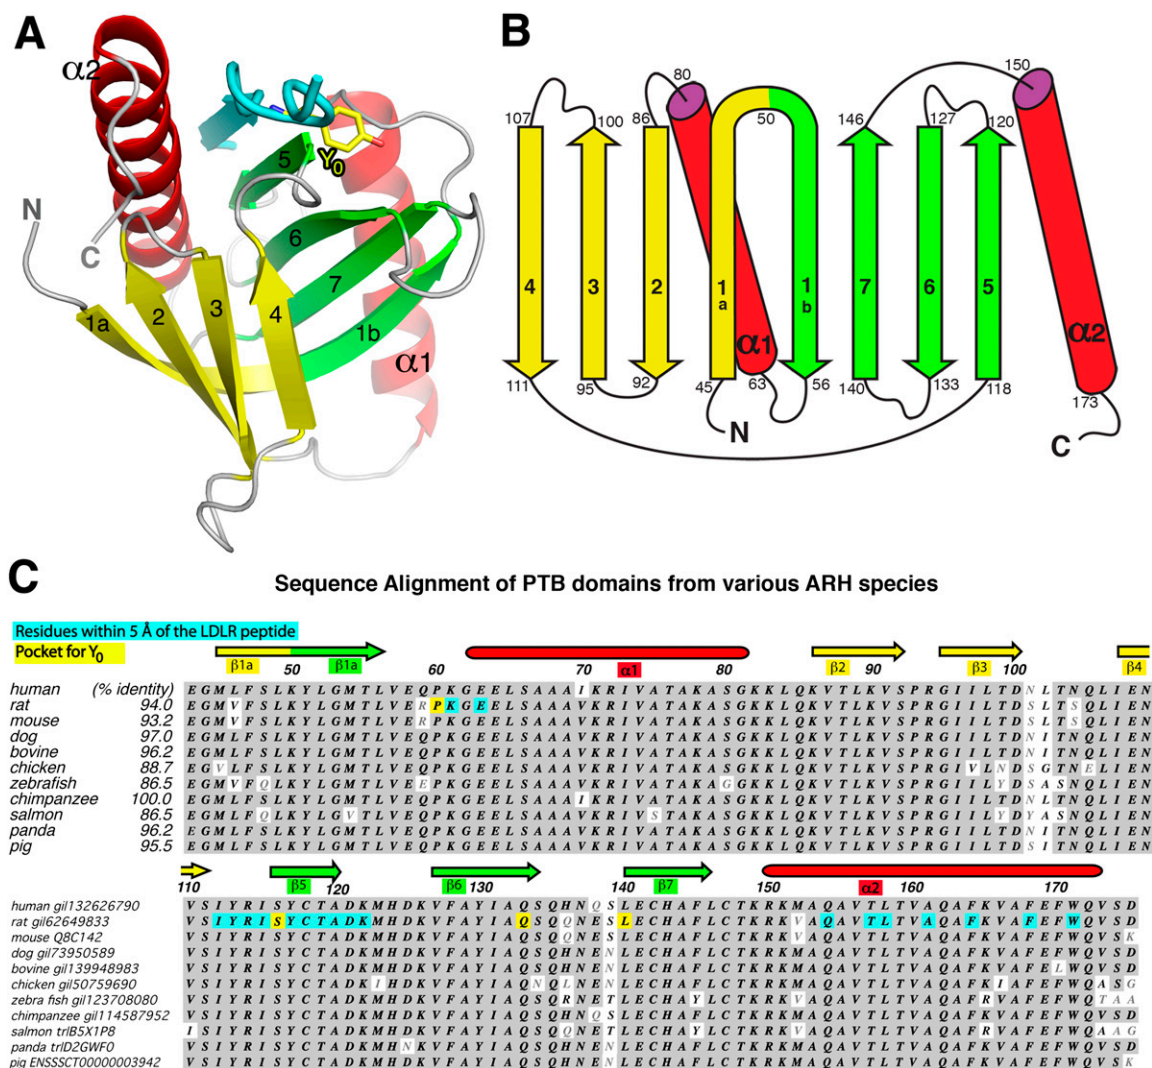

**Fig. S3.** Topology of the conserved PTB domain of ARH. (A) 3D structure of rat ARH (rARH) in complex with LDLR peptide.  $\beta$ -Strands of ARH are represented as green and yellow numbered arrows ( $\beta$ 1– $\beta$ 7) and  $\alpha$ -helices as red ribbons ( $\alpha$ 1,  $\alpha$ 2). The LDLR tail is drawn in cyan and the tyrosine ( $Y_0$ ) of its FxNPx $Y_0$  motif in yellow. (B) 2D topology of the PTB domain of ARH shows that it is made of an array of seven anti-parallel  $\beta$ -strands grouped into two  $\beta$ -sheets (yellow and green). Numbers at the top and bottom of each strand and helix indicate the residues that form them, respectively. (C) Sequence alignment of PTB domains from various ARH species. The numbering at the top corresponds to the rARH sequence, whereas the percentage identities to the left of each sequence refer to the human sequence. Identical residues are shaded. Amino acids in the proximity (within 5 Å) of the LDLR tail are highlighted in cyan. Residues lining the pocket for  $Y_0$  of the LDLR FXNPx $Y_0$  motif are highlighted in yellow.

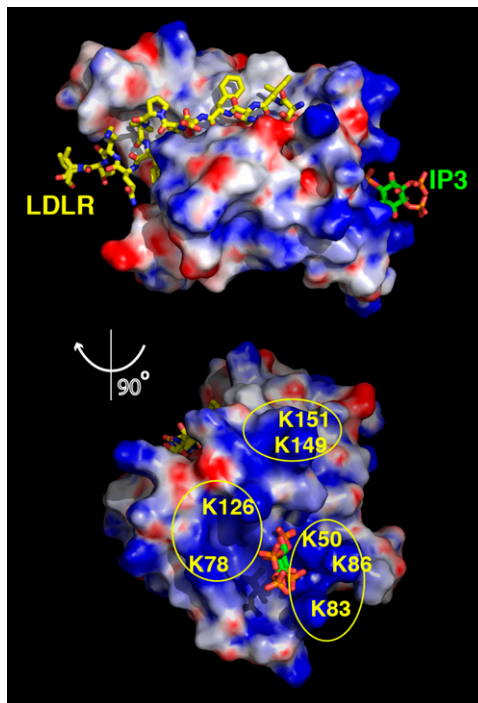

**Fig. S4.** Proposed binding area for phosphoinositides. Electrostatic surface representation of the structure of the PTB domain of ARH bound to the LDLR (yellow sticks). The related structure of the Dab1 (1) (PDB id 1NU2) in complex with a inositol-triphosphate (IP3) was overlaid on that of ARH according to the protein positions, and the resulting position of the IP3, the phosphorylated head group of PIP2, is displayed green sticks for carbons and orange for the phosphates. Although the ARH side-chains in corresponding positions to those that bind IP3 in Dab1 are not basic, there are three clusters of lysine residues (labeled in yellow, bottom view) in this vicinity that could bind negatively charged phosphate groups. This indicates that the mechanism of binding phosphoinositides by ARH is not identical but similar to that of Dab2. The electrostatic properties were evaluated using APBS (2) and displayed in PyMol, from  $-7$  kT/e (red) to  $+7$  kT/e (blue).

1. Stolt PC, et al. (2003) Origins of peptide selectivity and phosphoinositide binding revealed by structures of disabled-1 PTB domain complexes. *Structure* 11:569–579.
2. Baker NA, Sept D, Joseph S, Holst MJ, McCammon JA (2001) Electrostatics of nanosystems: application to microtubules and the ribosome. *Proc Natl Acad Sci USA* 98:10037–10041.

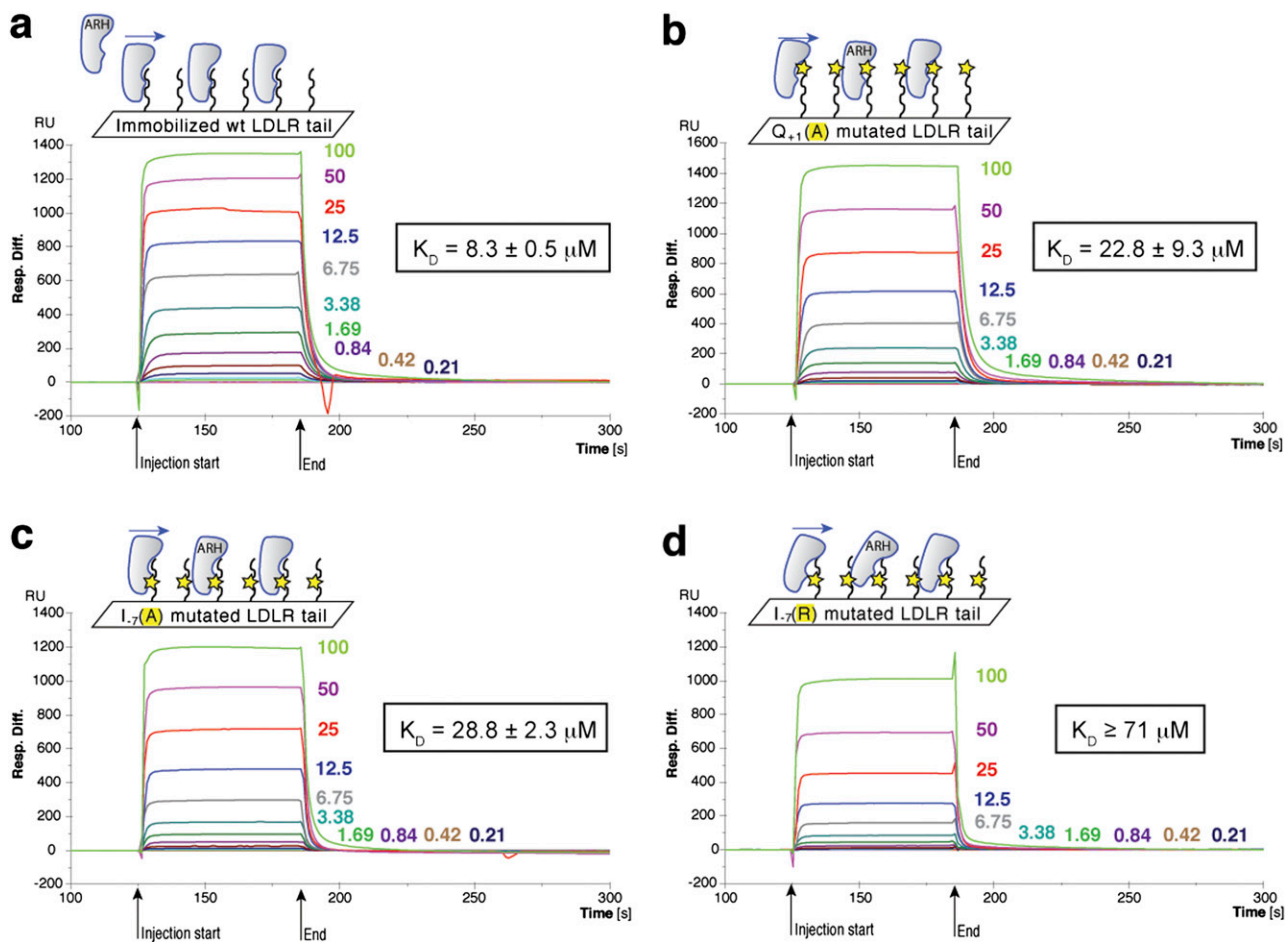

Fig. S5. Steady-state representative surface plasmon resonance sensorgrams from which Fig. 5 was generated.

**Table S1. List of protein sequences for interaction with ARH, which resulted from searching a sequence database (motif.genome.jp/MOTIF2.html)**

| Protein name                                                            | Database entry      | Sequence   |
|-------------------------------------------------------------------------|---------------------|------------|
| LDLR                                                                    | P01130              | INFDNPVYQ  |
| DAB2 interaction protein                                                | Q5VWQ8              | LSFQNPVYQ  |
| LRP8 (ApoER2)                                                           | Q14114              | MNFDNPVYR  |
| LRP4 human                                                              | O75096              | LTYSNPSYR  |
| MAP kinase kinase 2 (MAPKK 2)                                           | Q07192              | LNFNPAFK   |
| Tryptophan synthase $\alpha$ chain                                      | Q8TLP4              | MTYYNPVFR  |
| Ras GTPase-activating protein nGAP                                      | Q9UJF2              | LSFQNPVYH  |
| Ras guanine nucleotide exchange factor K                                | Q54FF3              | IRLTNPVFH  |
| Fusion glycoprotein F0                                                  | Q2Y2M3              | VTIDNPVYQ  |
| DNA-directed RNA polymerase subunit $\beta$                             | A1SEK1              | LSFENPVFY  |
| RING finger protein 31                                                  | Q96EP0              | VKFNNPVFR  |
| Tyrosine-protein phosphatase YVH1                                       | Q02256              | VDFDNPAYK  |
| Lipophorin receptor - <i>Aedes aegypti</i> (yellow fever mosquito)      | GenBank: AAQ16410.1 | MNFDNPVYR  |
| Parkinson disease 7 domain-containing protein 1                         | Q3B7H1              | FNLCNPVYH  |
| Cell cycle control protein 50C (extracellular domain)                   | Q2T9P5              | VKFQNPVAFQ |
| Minor capsid protein L2 (HPV type 67)                                   | Swiss O90729.1      | ITFDNPAFQ  |
| L2 protein - HPV 97                                                     | GenBank: ABO27082.1 | ITYDNPAFN  |
| Carm1-pending protein                                                   | XP_003144122        | LDLKNPLFR  |
| MEGF7, multiple EGF-like motifs (LRP4/LRP10)                            | GenBank: BAA32468.1 | LTYSNPSYR  |
| Reticuline oxidase                                                      | P30986              | LSIQNPLFQ  |
| Bifunctional aspartokinase/homoserine dehydrogenase                     | P44505              | VDLNNPLYK  |
| 2',3'-Cyclic-nucleotide 2'-phosphodiesterase                            | P47376              | INIKNPLYN  |
| Epithelial discoidin domain-containing receptor 1                       | Q08345              | LLLSNPAYR  |
| $\beta$ -1,3-GalNAc-T2                                                  | Q5M900              | LNITNPTFK  |
| Rhizobactin siderophore biosynthesis protein rhbC                       | Q9Z3R0              | LQITNPLFE  |
| Putative translation initiation factor eIF-2B subunit 2                 | Q57586              | KIRNPADF   |
| Probable cation-transporting ATPase 13A4                                | Q4VNC1              | VSYSNPVFE  |
| 1,4- $\alpha$ -D-glucan glucanohydrolase                                | P53354              | FSLSNPLFN  |
| LRP1B                                                                   | Q9NZR2              | VEIGNPSYN  |
| Diadenosine tetraphosphatase                                            | A3N0C2              | FKLDNPLFH  |
| $\beta$ -1,3-N-acetylgalactosaminyltransferase II                       | Q5M900              | LNITNPTFK  |
| Transcription factor castor                                             | Q7M3M8              | FQLQNPLFY  |
| Ceroid-ipo-fuscinosis neuronal protein 5 homolog                        | Q553W9              | YNISNPVYQ  |
| CCR4-NT transcription complex subunit 1                                 | A0JP85              | YELDNPVYQ  |
| Protein dItD                                                            | P39578              | FHIDNPVYK  |
| DNA polymerase                                                          | P87503              | FALPNPAYK  |
| Formamide amidohydrolase                                                | Q50228              | YGIKNPVFQ  |
| Probable Ras GTPase-activating protein                                  | Q8T498              | LAFKNPSYQ  |
| High-affinity potassium transporter (yeast)                             | P50505              | IQIANP5FN  |
| Spheroidin (viral)                                                      | P23061              | VYITNPSFN  |
| GTPase-activating protein SynGAP                                        | Q96PV0              | LSFQNPVYH  |
| Uncharacterized protein L442 ( <i>Acanthamoeba polyphaga</i> mimivirus) | Q5UQN6              | MGFHNPSYN  |
| EGFR(Receptor tyrosine-protein kinase erbB-1)                           | P00533              | GSVQNPVYH  |
| LRP1B                                                                   | Q9NZR2              | VEIGNPSYN  |
| LRP1 (ApoER)                                                            | Q07954              | VEIGNPTYK  |
| Hepatocyte growth factor receptor                                       | P08581              | IYVHNPVFK  |
| Probable phospholipid-transporting ATPase VB                            | O94823              | GQLSNPTFY  |

The structure-based ARH specificity formula  $\Phi_{-7}x\Phi_{-5}xNP\psi[F/Y]_0\Omega_{+1}$  was used.  $\Phi$  stands for a bulky aliphatic or aromatic residue such as Ile, Met, or Phe;  $x$  for mostly polar (these are the noncontacting residues that contribute least to the binding);  $\psi$  for small aliphatic residues such as Val, Ala, or possibly Thr; and  $\Omega$  for long polar residues with hydrogen-donating group such as Gln, Asn, His, Tyr, Lys, or Arg. To keep all of the possible sequences resulting from this search, the whole raw list is presented and no filtering for specific organisms was applied. Only sequences of cytoplasmic domains are shown. Uniprot database entries are listed unless otherwise indicated.
